# Supplementary material for: Emerging Tobacco-Related Cancer Risks in China: A Nationwide, Prospective Study of 0.5 Million Adults
Source: PubMed Central journal article supplement (PMC4584499; doi:10.1002/cncr.29560), 2015-09-01

## **Web material contents list:**

Webtable 1: Prevalence of smoking in men and women by various baseline characteristics

Webfigure 1: Smoking patterns by year of birth and area among men

Webfigure 2: Adjusted risk ratios for all cancer and lung cancer in male smokers, by area

Webtable 2: Number of cancer cases at age 40-79, adjusted risk ratios and population attributable fractions for current versus never smokers in men and women

Webfigure 3: Adjusted risk ratios for all cancer and lung cancer by years stopped smoking among male ex-smokers who had stopped because of ill health

Webfigure 4: Lung cancer incident rates, in Chinese smokers, compared with Chinese and US non-smokers

**Webtable 1: Prevalence of smoking in men and women by various baseline characteristics**

|                                     | No. of People | Never Smoker, % | Regular Smoker, % |        |         |                   |                        |
|-------------------------------------|---------------|-----------------|-------------------|--------|---------|-------------------|------------------------|
|                                     |               |                 | All               | Former | Current | Current cigarette | Current cigarette only |
| <b><u>Men</u></b>                   |               |                 |                   |        |         |                   |                        |
| Overall                             | 210,259       | 25.7            | 74.3              | 13.3   | 61.1    | 54.1              | 51.8                   |
| <i>Mean exhaled CO (ppm)</i>        |               | 5.4             | 13.2              | 5.2    | 14.9    | 15.4              | 15.3                   |
| <b>Location</b>                     |               |                 |                   |        |         |                   |                        |
| Urban                               | 68,994        | 33.6            | 66.4              | 15.9   | 50.5    | 49.3              | 48.6                   |
| Rural/semi-rural                    | 141,265       | 21.8            | 78.2              | 12.0   | 66.2    | 56.4              | 53.4                   |
| <b>Age group (years)</b>            |               |                 |                   |        |         |                   |                        |
| 30-39                               | 29,601        | 31.5            | 68.5              | 5.6    | 62.9    | 61.6              | 60.4                   |
| 40-49                               | 59,240        | 23.7            | 76.3              | 8.7    | 67.6    | 64.6              | 62.6                   |
| 50-59                               | 63,725        | 22.2            | 77.8              | 13.6   | 64.2    | 55.8              | 52.9                   |
| 60-69                               | 41,339        | 27.0            | 73.0              | 19.7   | 53.2    | 40.5              | 37.9                   |
| 70-79                               | 16,354        | 32.0            | 68.0              | 26.3   | 41.7    | 30.0              | 28.1                   |
| <b>Highest education</b>            |               |                 |                   |        |         |                   |                        |
| No formal School                    | 18,667        | 19.3            | 80.7              | 16.2   | 64.5    | 46.5              | 42.6                   |
| Primary School                      | 70,121        | 20.9            | 79.1              | 14.4   | 64.7    | 53.1              | 50.0                   |
| Middle or high school               | 104,915       | 26.7            | 73.3              | 12.0   | 61.3    | 58.3              | 56.6                   |
| College or University               | 16,556        | 46.4            | 53.6              | 13.4   | 40.2    | 39.9              | 39.7                   |
| <b>Household income (yuan/year)</b> |               |                 |                   |        |         |                   |                        |
| < 5,000                             | 19,457        | 23.5            | 76.5              | 12.8   | 63.7    | 37.2              | 31.5                   |
| 5,000-19,999                        | 35,288        | 24.0            | 76.0              | 11.0   | 65.1    | 50.6              | 45.5                   |
| 20,000-34,999                       | 59,568        | 25.9            | 74.1              | 13.9   | 60.2    | 54.5              | 52.3                   |
| >=35,000                            | 53,412        | 26.1            | 73.9              | 14.1   | 59.8    | 58.3              | 57.5                   |
| <b><u>Women</u></b>                 |               |                 |                   |        |         |                   |                        |
| Overall                             | 302,632       | 96.8            | 3.2               | 0.9    | 2.4     | 2.1               | 2.1                    |
| <i>Mean exhaled CO (ppm)</i>        |               | 4.5             | 9.0               | 3.9    | 10.9    | 11.2              | 11.2                   |
| <b>Location</b>                     |               |                 |                   |        |         |                   |                        |
| Urban                               | 103,932       | 96.4            | 3.6               | 1.0    | 2.6     | 2.3               | 2.3                    |
| Rural/semi-rural                    | 198,700       | 96.9            | 3.1               | 0.8    | 2.3     | 2.0               | 2.0                    |
| <b>Age group (years)</b>            |               |                 |                   |        |         |                   |                        |
| 30-39                               | 48,203        | 99.3            | 0.7               | 0.1    | 0.7     | 0.7               | 0.7                    |
| 40-49                               | 93,508        | 98.6            | 1.4               | 0.2    | 1.2     | 1.2               | 1.2                    |
| 50-59                               | 93,831        | 97.1            | 2.9               | 0.7    | 2.2     | 2.1               | 2.0                    |
| 60-69                               | 50,434        | 92.5            | 7.5               | 2.4    | 5.1     | 4.4               | 4.4                    |
| 70-79                               | 16,656        | 89.9            | 10.1              | 3.8    | 6.3     | 5.2               | 5.1                    |
| <b>Highest education</b>            |               |                 |                   |        |         |                   |                        |
| No formal School                    | 76,554        | 95.5            | 4.5               | 1.4    | 3.1     | 2.6               | 2.6                    |
| Primary School                      | 95,095        | 95.8            | 4.2               | 1.2    | 3.1     | 2.8               | 2.8                    |
| Middle or high school               | 117,525       | 98.1            | 1.9               | 0.4    | 1.5     | 1.5               | 1.5                    |
| College or University               | 13,458        | 99.0            | 1.0               | 0.2    | 0.8     | 0.8               | 0.7                    |
| <b>Household income (yuan/year)</b> |               |                 |                   |        |         |                   |                        |
| < 5,000                             | 30,746        | 91.8            | 8.2               | 2.4    | 5.7     | 4.7               | 4.6                    |
| 5,000-19,999                        | 59,341        | 95.9            | 4.1               | 1.1    | 3.1     | 2.8               | 2.7                    |
| 20,000-34,999                       | 89,445        | 96.8            | 3.2               | 0.8    | 2.3     | 2.2               | 2.2                    |
| >=35,000                            | 73,309        | 98.2            | 1.8               | 0.5    | 1.3     | 1.3               | 1.3                    |

# Webfigure 1. Smoking patterns by year of birth & area among men

(white square: rural, black square: urban)

### a) Age started smoking

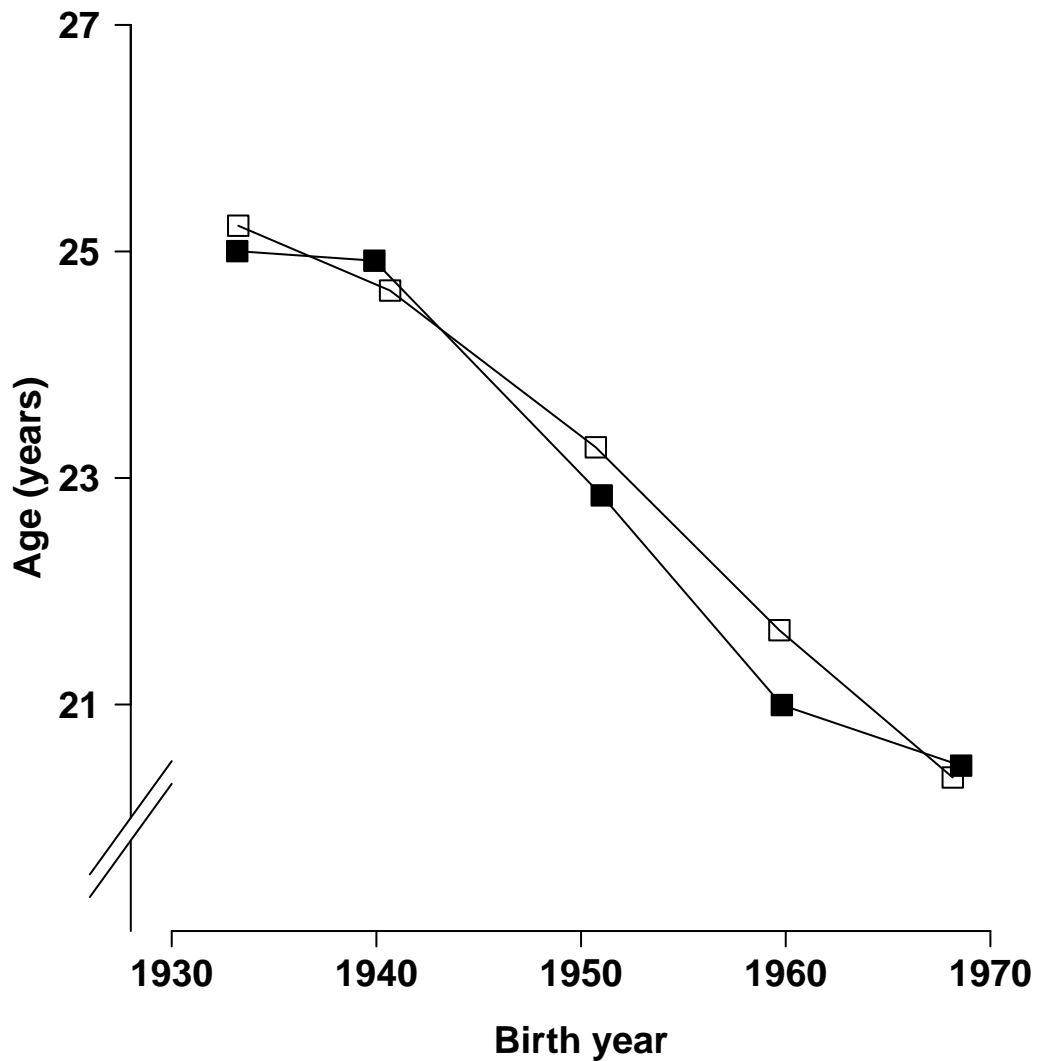

### b) Amount/day (when last smoked)

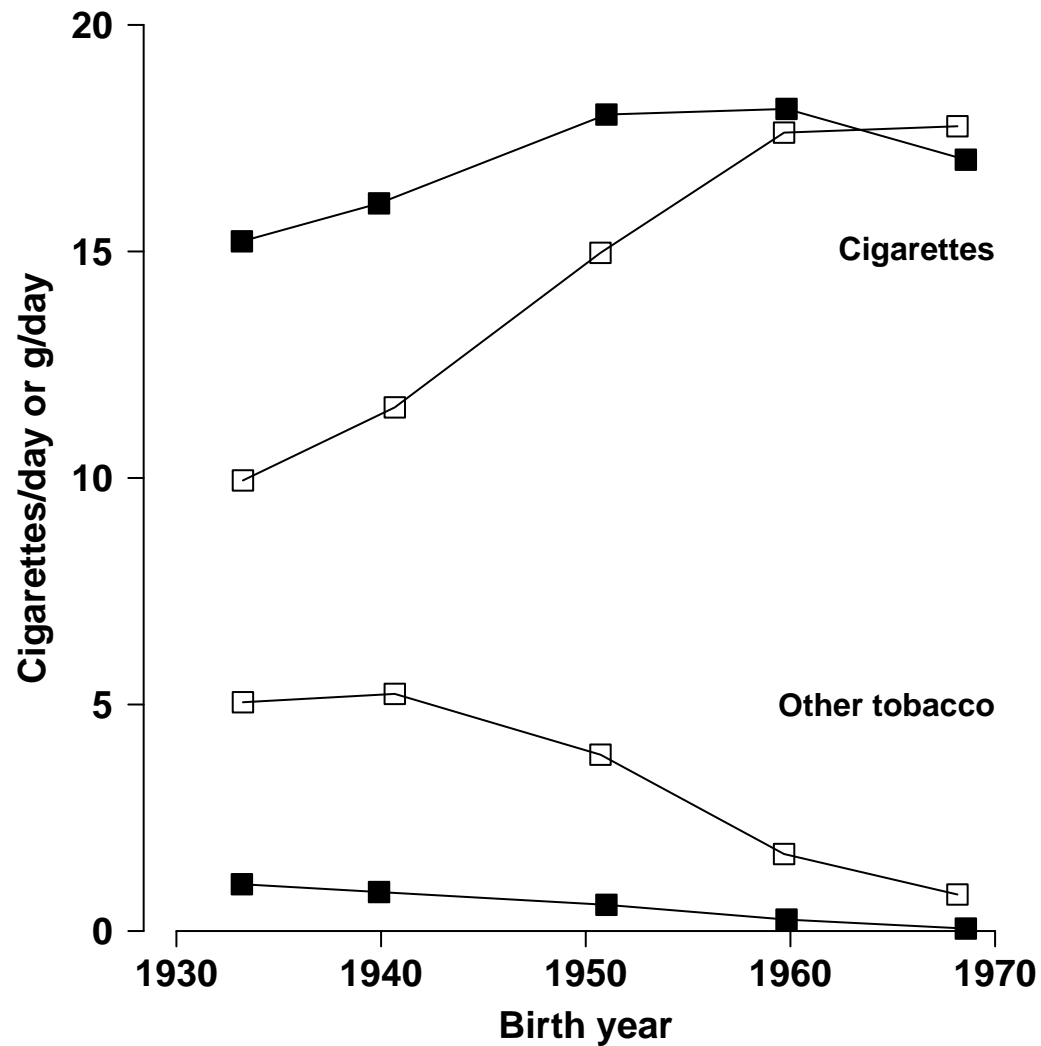

**Webfigure 2: Adjusted risk ratios for all cancer and lung cancer in male smokers, by area**

**a) All Cancer**

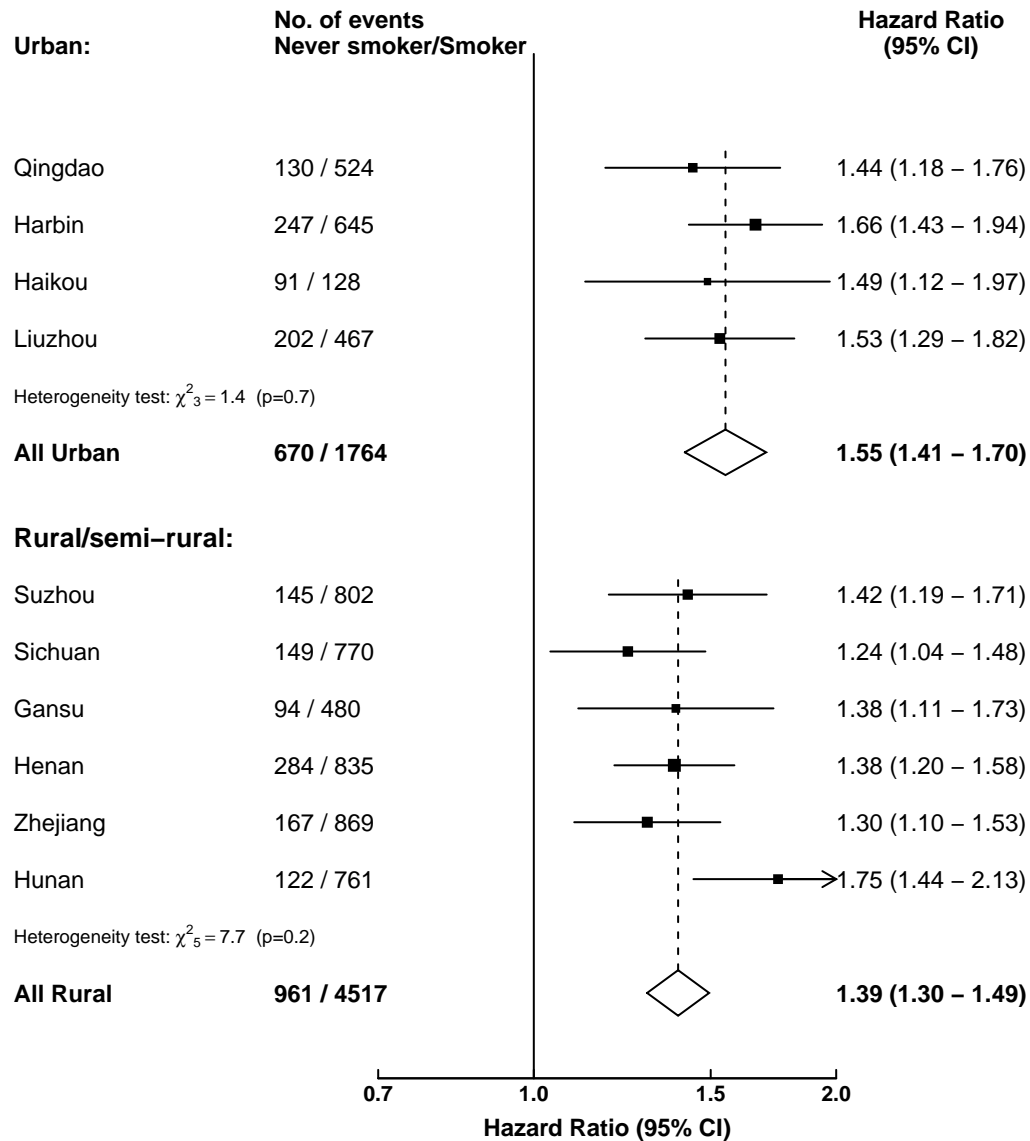

**b) Lung Cancer**

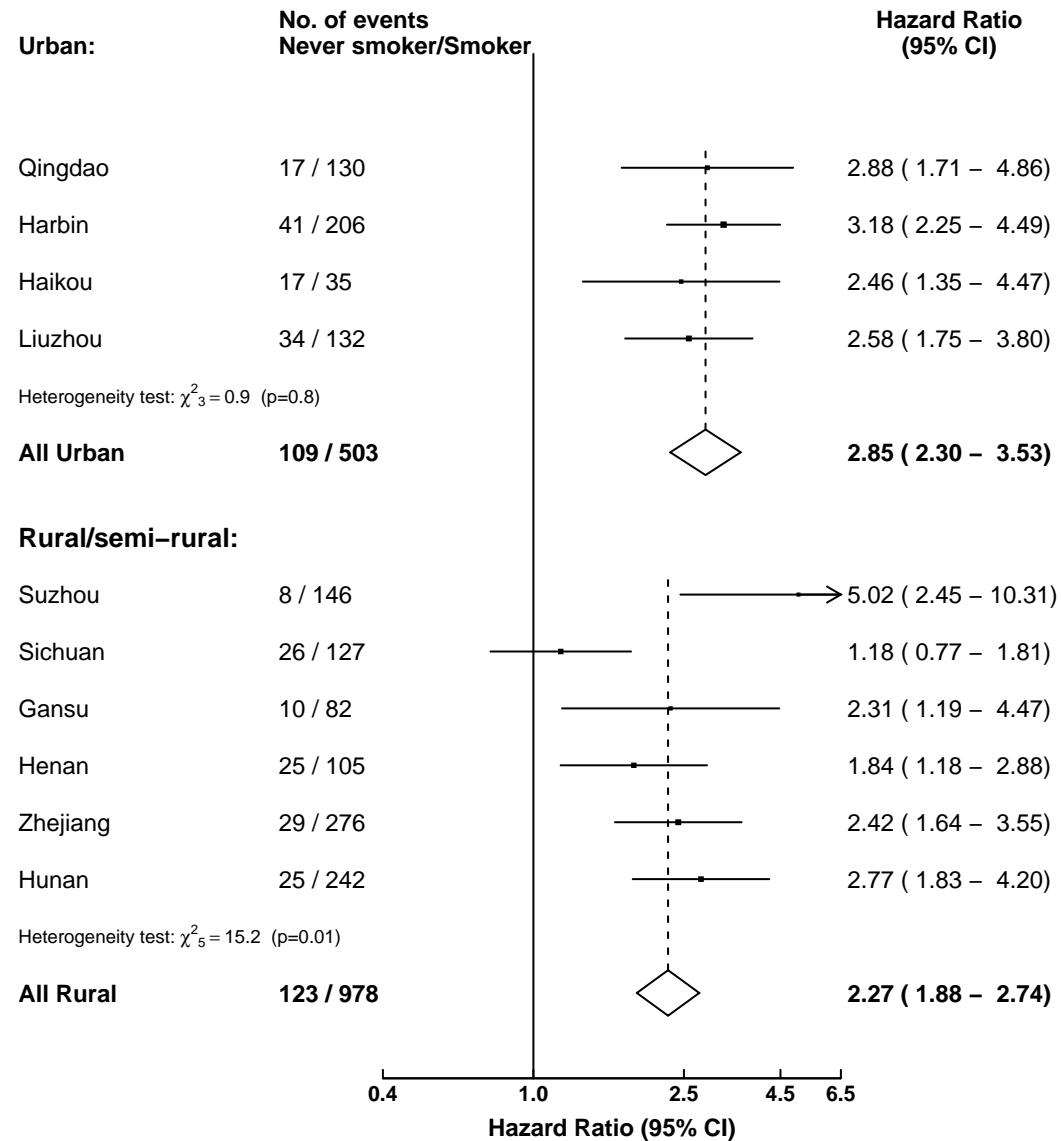

**Webtable 2: Number of cancer cases at age 40-79, adjusted risk ratios and population attributable fractions for current versus never smokers in men and women<sup>§</sup>**

|                               | Men           |                              |                          |                      | Women         |                              |                          |                      |
|-------------------------------|---------------|------------------------------|--------------------------|----------------------|---------------|------------------------------|--------------------------|----------------------|
|                               | No. of Events |                              | RR (95% CI) <sup>b</sup> | PAF (%) <sup>c</sup> | No. of Events |                              | RR (95% CI) <sup>b</sup> | PAF (%) <sup>c</sup> |
|                               | Never Smokers | Current Smokers <sup>a</sup> |                          |                      | Never Smokers | Current Smokers <sup>a</sup> |                          |                      |
| Lung cancer                   | 232           | 1290                         | 2.63 (2.28-3.04)         | 43                   | 1031          | 99                           | 2.26 (1.80-2.83)         | 5                    |
| Liver cancer                  | 207           | 662                          | 1.28 (1.09-1.51)         | 14                   | 458           | 25                           | 1.34 (0.87-2.08)         | 1                    |
| Stomach cancer                | 250           | 812                          | 1.33 (1.15-1.55)         | 16                   | 582           | 28                           | 1.26 (0.84-1.90)         | 1                    |
| Oesophagus cancer             | 179           | 694                          | 1.55 (1.31-1.83)         | 24                   | 442           | 12                           | 1.12 (0.60-2.10)         | 0                    |
| Breast cancer                 |               |                              |                          |                      | 1286          | 28                           | 0.97 (0.66-1.44)         | 0                    |
| Five minor sites <sup>d</sup> | 131           | 450                          | 1.53 (1.25-1.87)         | 22                   | 421           | 18                           | 1.11 (0.67-1.82)         | 0                    |
| All other cancers             | 632           | 1507                         | 1.09 (0.98-1.20)         | 4                    | 3786          | 147                          | 1.25 (1.05-1.49)         | 1                    |
| <b>All cancer</b>             | <b>1631</b>   | <b>5415</b>                  | <b>1.46 (1.37-1.54)</b>  | <b>20</b>            | <b>8006</b>   | <b>357</b>                   | <b>1.38 (1.24-1.55)</b>  | <b>1</b>             |

<sup>§</sup> Excludes 2577 participants (969 male) with cancer at baseline.

<sup>a</sup> Excludes ever regular smokers who had stopped smoking by choice or because of ill health.

<sup>b</sup> Risk ratios were adjusted for area and age at risk (strata), and education (4-levels) and alcohol (never, occasional, regular). Confidence intervals (CI) are for the comparison of current smokers vs. never smokers.

<sup>c</sup> RR used for calculating PAF is for current smokers.

<sup>d</sup> Five minor sites: Mouth, Pharynx, Bladder, Larynx or Pancreas Cancer (ICD-10: C00-C14, C25, C32 or C67).

Webfigure 3: Adjusted risk ratios for all cancer and lung cancer by years stopped smoking among male ex-smokers who had stopped because of ill health

a) All Cancer

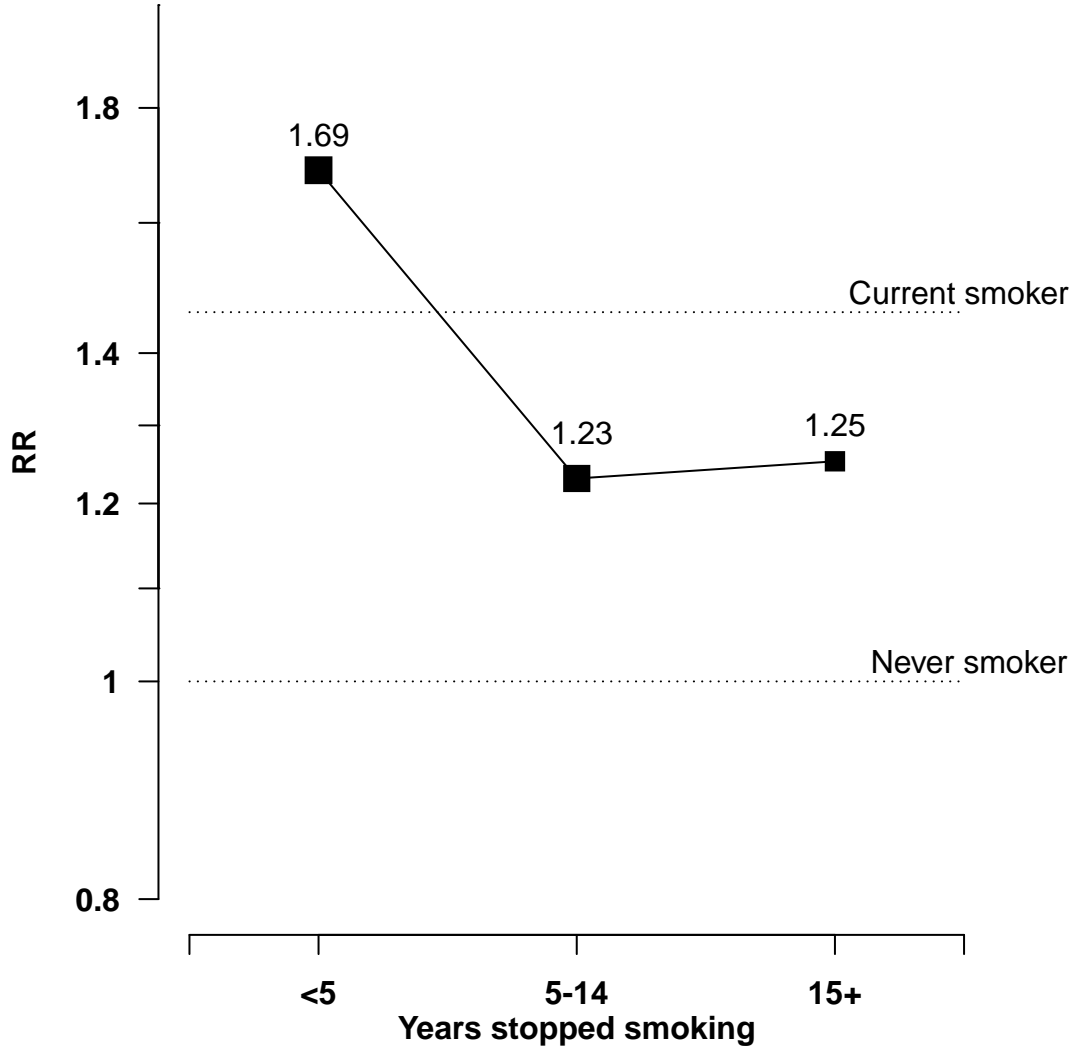

b) Lung Cancer

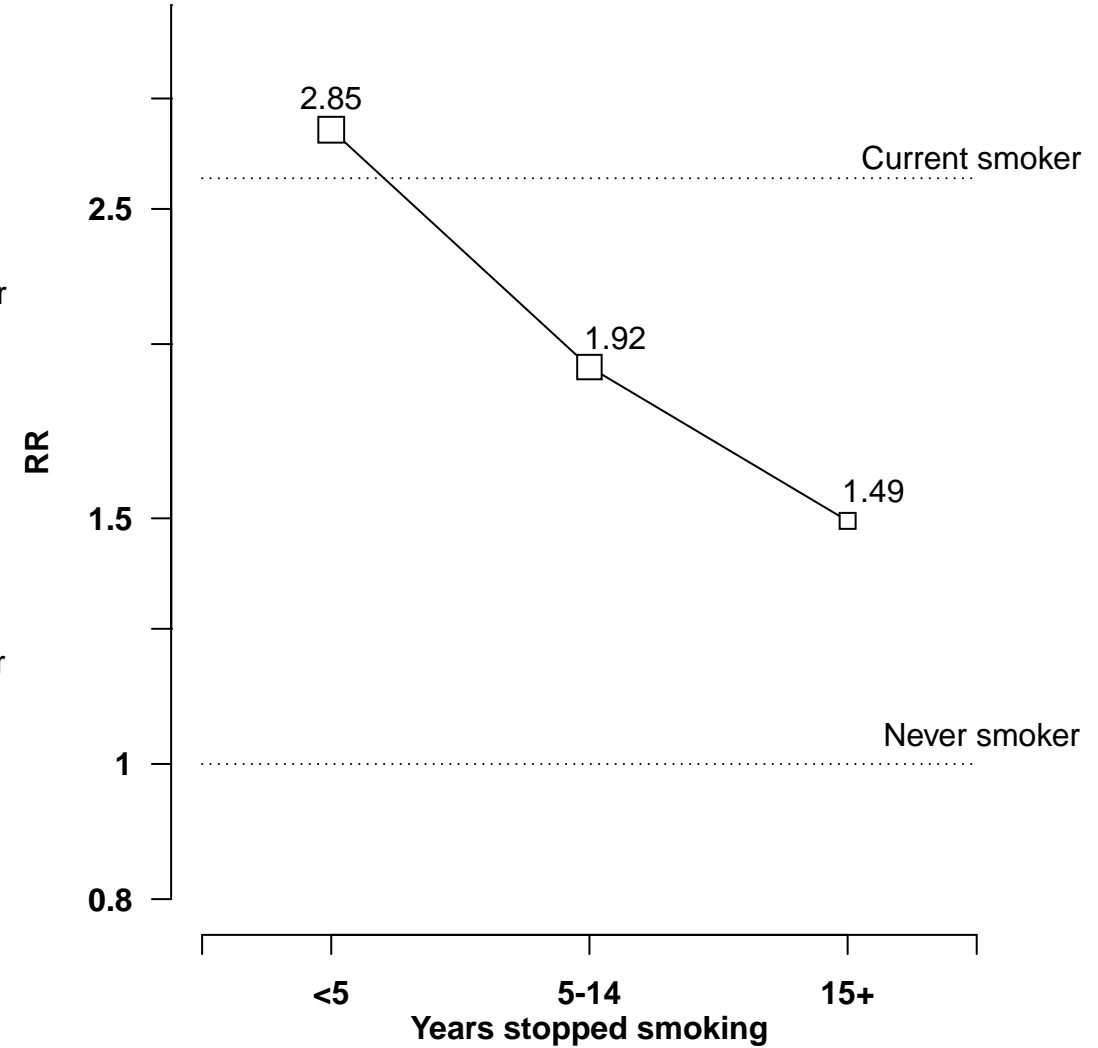

| Years stopped smoking (mean): | <5 (2.4)         | 5–14 (8.5)       | 15+ (21.2)       |
|-------------------------------|------------------|------------------|------------------|
| No. of events:                | 355              | 332              | 179              |
| RR (95% CI):                  | 1.69 (1.52–1.87) | 1.23 (1.05–1.37) | 1.25 (1.08–1.45) |

| Years stopped smoking (mean): | <5 (2.4)         | 5–14 (8.5)       | 15+ (21.2)       |
|-------------------------------|------------------|------------------|------------------|
| No. of events:                | 85               | 74               | 32               |
| RR (95% CI):                  | 2.85 (2.29–3.54) | 1.92 (1.53–2.42) | 1.49 (1.05–2.12) |

**Webfigure 4: Lung cancer incidence rates, in Chinese smokers compared with Chinese and US never smokers**

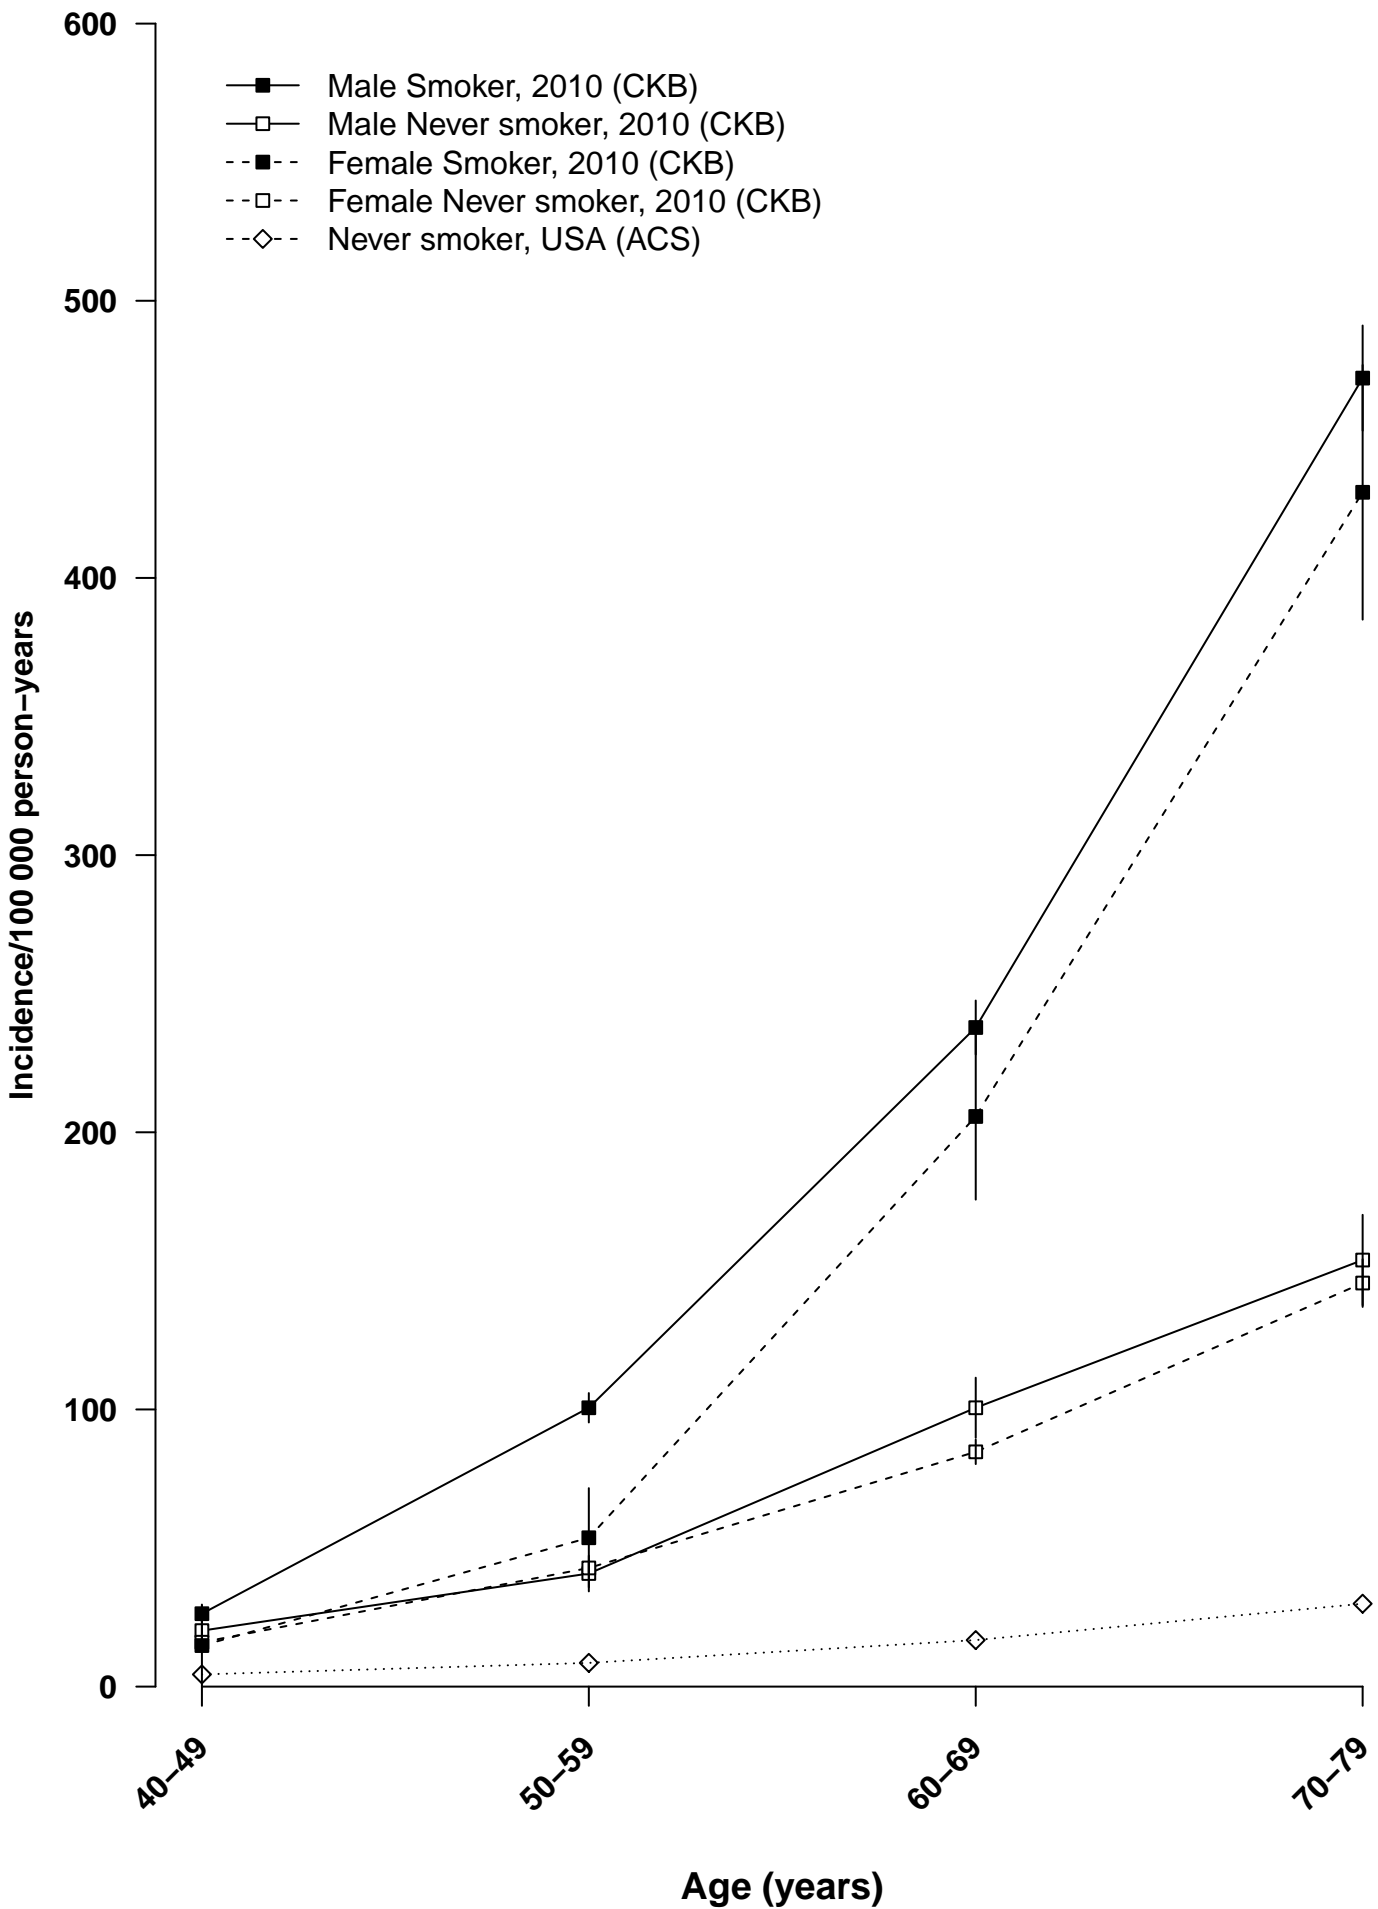

Supplement: cncr0121-3097-sd1.pdf [file cncr0121-3097-sd1.pdf]
